# Supplementary material for: Stringent Expression Control of Pathogenic R-body Production in Legume Symbiont Azorhizobium caulinodans
Source: PubMed Central journal article supplement (PMC5527310; doi:10.1128/mbio.00715-17), 2017-07-25

**A**

proposed by  
Frederix et al (2011):  
SELEX product:  
*reb* promoter candidate #1:  
candidate #2:  
candidate #3:  
candidate #4:

```

---CAACnnnnnGTTG---
aggctaCAACTctagGTTgtgc
ggcgcCAAgaacaTTTtaac
ttataCAATctaaaATAGatta
atgtcCTACcttcgGTTCcact
catgtCGACcacagGTTc gat

```

**B**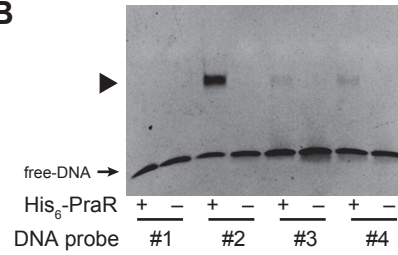**C**

#2 (PraR binding site A)  
w: ttataCAATctaaaATAGatta  
m: -----TG-----C-----

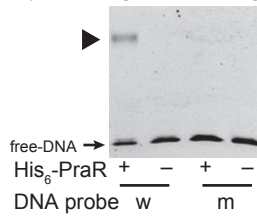

#3 (PraR binding site B)  
w: atgtcCTACcttcgGTTCcact  
m: -----TG-----A-----

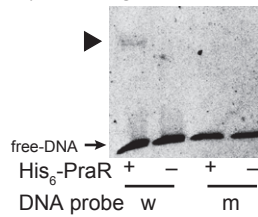

#4 (PraR binding site C)  
w: catgtCGACcacagGTTc gat  
m: -----T-----A-----

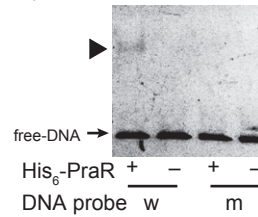**D**

SELEX products:  
*reb* promoter:

```

actgatttGTAACatttGTTAC
agtgtgtGTAACatttGTTAC
atcagtGTAACaattGGTACac
atgGTGACTtttGTTACacatc
aatgggggGTGACTtttGTTAC
agtgttatGTGACTtttGGTAC
tcaaGTGACTttcATCACcgac

```

**E**

w: tcaaGTGACTttcATCACcgac  
m1: -----AC-----  
m2: -----GT-----

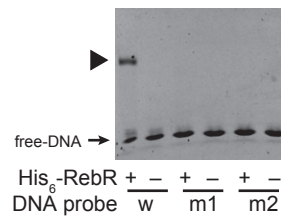

Supplement: mbo004173406sf5.pdf [file mbo004173406sf5.pdf]
