# Supplementary material for: Stringent Expression Control of Pathogenic R-body Production in Legume Symbiont Azorhizobium caulinodans
Source: PubMed Central journal article supplement (PMC5527310; doi:10.1128/mbio.00715-17), 2017-07-25

**A**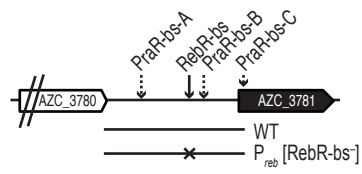**B**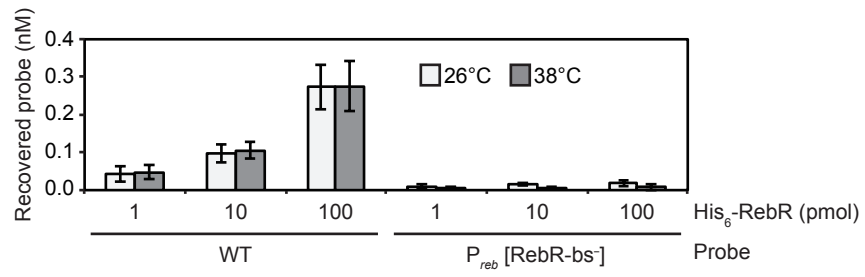**C**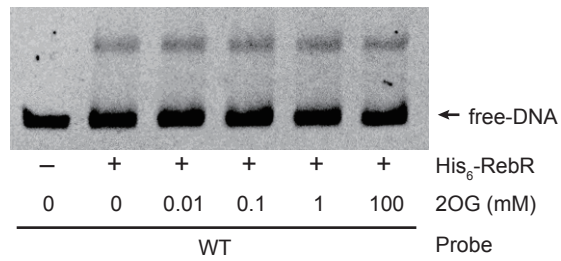

Supplement: mbo004173406sf7.pdf [file mbo004173406sf7.pdf]
